# Supplementary material for: Microarray: a global analysis of biomineralization-related gene expression profiles during larval development in the pearl oyster, Pinctada fucata
Source: PubMed Central journal article supplement (PMC4445274; doi:10.1186/s12864-015-1524-2), 2015-04-19
Supplement: 12864_2015_1524_MOESM5_ESM.pdf [file 12864_2015_1524_MOESM5_ESM.pdf]

### 1. Unigene18749

#### Nucleotide sequence:

CGGAATAACATTACTGAGACTTTTAGAAAATCAGGGAAAAACATTATATAACAGCGGGATATTA  
TATCCAAGATAATTAAGAAACATGAAACGGATTTATGTTCTAGTTCTTATTCAATTTGCTTGTG  
TGTATAGCGGAGGCGCAAAAGAAATCCAAAGATAGCAAAAAGCATCAAGCAAATCCTCAAG  
CAAATCCTCTGGCAAGTCTAAATCGTCTCCAAAGTCATCCGGGGCCAAAGGCAAGTCTCCTAC  
CCCATCGGCCCCCGGATGACTTTGGAGACGATTTAGACTTGCCAGAGGATTTGCTTGAGGATTT  
GCTTGATGCTTTTTTGGTCAAACAGACTACTCAAAGCTATCAAGGCCGGGGAACAAATGCCAC  
CACCGATGTGTCCGAATGGTCTACCAAAGCTGACTGTTCTCCAATTGCATGTGACAAATGGA  
CATGTTCTAATATATTGAACACTGTATGCAAGGAACAGTGTACGTTTGCAGCCTAAATTCTA  
CATTGGTGGAAGTGAAGTACTCAATTCTGTGAATTAACCTGCCAACACGCAGCCTCGGGC  
AAATCAGTCTCCTCCAACATCACGTAATACGGCAACAGATCAAGGATCACAGAATTCGGGACC  
TAGCTCCAATGGGGCACCATCAAATATGCCGCCCATGCCGGGCATGCCAATGATGTTTTCTGA  
GAACCAATGCCAATGGGCGGACCACCCGGAATGGAATTTATGCCAACTTTGAAAATTTCCC  
TCCTGGAATGAGTCCTATGCAATTTTCCATCATCTACAGAATATGAACATGCCGAATGAAAAC  
CAGGGAATAAGATCACAGGCCAATTAATAATTTCTTGTTCAGCGTTTGATTTTCATCAACAA  
TTTTATTTTCAGTTTTTCATCATCACCATATTTGTTGAAATTTTAATAACTTTGCATTAACCATAC  
ATATTTTACTGCCA

#### PREDICTED ORF:

**MKRIYVLVLLFILLVCIAEA**QKKS KDSK KASSKSSSKSSGKSKSSPKSSGAKGKSPTSPAPDDFGDDL  
DLPEDLLEDLLDAFLVKQTTQSYQGRGTNATTDVSEWSTKS

### 2. Unigene34354\_TP

#### Nucleotide sequence:

TCAATATTCTGTCTTTTCAGAACACAGGAAGCATACTCAAGCATGAAATTACAGACTTCATTAG  
TCATCATGTGTGTTCTCTGCACCATCTGTTATACAGCCCCTTGGAATTTGGAGGATCTTAACCTT  
GAAAACGCGATGGATGAAGAAAATGACGATTTTCGAGAAGAATAGACGAATGGTCAATGGAG  
ACAGTAGTAGAAGCAACAGTGAGGGATTGAGTTCTGTATTGGAAAGGAGAAATCTAATTGCT  
GCTATTGCTGCTGCTCAAAGCCAACAAGCTTTAAACAAGTTGATGGCGCAAATGATGAATCAA  
ATGATGAACCAAATGACAAATTCTCAAAGGCAAAGAATTCGGCAACAGATGAGTCANNNNN  
NNNNNNNNNNNNNNNNNNNNNNNNNNNNNNNNNNNNNNNNNNNNNNNNNNNNNNNNNNNN  
NNNNNNNNNTTTGGATTTAATTAGATTAACCTCGTAATCAGA ACTCTGCCAACACATCTTAA  
CTGCGA

#### PREDICTED ORF:

**MKLQTSLVIMCVLCTICYT**APWNLEDLNLENAMDEENDDFEKNRRMVNGDSSRSNSEGFSSVL  
ERRNLIAAIAAAQSQQALNKLMAQMMNQMMNQMTNSQRQRIRQQMSXXXXXXXXXXXXXXXX  
XXXXXXXXXXFGFN

### 3. Unigene35118\_TP

#### Nucleotide sequence:

CGGAAAGAAAGCGAAATAGTAGACTGGAAAATGATGGAAAATTGATATTTTTCTGTTTTTTG  
ATCCGTTAATGTGGAATCATGTCTTTCACATGGTAGATTAATAAGACCACCATCCCGAAATTC  
AGCATGGCGATATCATCTCAGTGATGTACAGGATTACAACGATATGGGACACAATTGTGGAGG

AAAAATTATCAATGGTCGAATGGAGGAAAATGTGGATTATGCGGAGATCCCTTTGATGGTGT  
ACAGGATAACATGGCTGGTGGAAAATACGGTAAGGCTACCAGAAATATCACAGGATGCTACG  
AATTGGCGTCACCAACAGAAATAGATGTGGCGGTACAGATCACAGCCCAGCATAAGGGATTC  
TTTGAATTCAGACTTTGCGTGAACAATAATTTGAGCAAACCCATTACACAAGAATGCCTTGATG  
AACACCTGCTGAAAATCAATGGTACAGACGAGACTCGATTCTATGGGATATCAGAAAACAAAG  
TTTACAATCTAAAATAAGTGTGCCAGGAAACATTCAAGTGTGACCAATGCGTCCTACAATGGA  
AATGGAATACGGGAACTCCTATGGCTGCATTCCGGGGACGAATGATTGTGGAATTGGCTTTG  
GCCAACAAGAACAGTTTTATGCTTGTGCCGATATTTCTATCAAAGGAACTGCAATAGAGGTG  
GAACTACGATTTTGCCGACTCAAGCGCCTTTACAGAAGCACCTTGGTATCCAGCACCAATGA  
CAGCGGCACCACAGACGCAAGCACCAATGACAGCGGCACCACAGACACAAGCGCCAATGAC  
AGCGGCACCACAGACGCAAGC

**PREDICTED ORF:**

MMEKLIFFCFLMPLMWNHVSSHGRLIRPPSRNSAWRYHLSDVQDYNDMGHNCGGKNYQWS  
NGGKCGLCGDPFDGVQDNMAGGKYGKATRNITGCYELASPTIDVAVQITAQHKGFFEFRLCVN  
NNLSKPITQECLDEHLLKINGTDETRFYGISENKVYNLKLSVPGNIQCDQCVLQWKWNTGNSYG  
CIPGTNDCGIGFGQQEQFYACADISIKGN CNRGGTTILPTQAPLTEAPWYPAPMTAAPQTQAPM  
TAAPQTQAPMTAAPQTQ

**4. Unigene51738\_TP**

**Nucleotide sequence:**

TACGATTCCCTGTGAAAGACAATCAAACACCAGTGATATCCACCGAGATGAAGTCAGCTACGG  
TAGCAGTCCTATTTGCCGTGTTATTCACAGCGTACGGAAATCCATGGAATTATCCAGGAAGATA  
TTATTATGGATACTCCAATTGCTATGACTATGACTGTAATGGAATGAACTGCAGATCTATGGGTA  
ACGACTTTTATTGTATGACAACTATAGATATTACCCCATGTTTGGTAACCATCACTCACGATCAT  
GTGAATGCAGGAACATGAACATGGGTAGAGAGTTCTTCTATCGTAACAACCTGGAACAACATA  
ACATGAACAATTGGTGGAACAGATGGAACAGGAACAACCTGGTGGAATAACTGGAAC

**PREDICTED ORF:**

MKSATVAVLFAVLFTAYGNPWNYPGRYYYYGYSNCDYDCNMGMNCRSMGNDFYCMTNYRYYP  
MFGNHHSRSECRNMNMGREFFYRNNWNNYNMNNWWRWNRNNWNNWN

**5. Unigene56675\_TP**

**Nucleotide sequence:**

GTGGATGTACGTGCTCAGAATGAGATAATAACAGTTTCAAATGAGCAGGCTAACGTTACTGG  
CGTTATTGGTTGCTGTGGTAGTTATTTACGTGTGCTAGGTCAAGGCCAAGAGAAAGAAAA  
AGGAACGAACATGAACCAGGAAACCAGGATGGTAGAAATCAAATGAAAGAAGAGAAAGA  
AATTTGAAAATACCAACACGAAAGAGCCGTCGGATAGTAAACAGAAATAATAACGGGAAACA  
GATGCAAACCTTGGCAACGTCAAACCTATGTCAGGAAATACCGCCGCATTTCTCCTACGAACAC  
TATTAATCGTAACAACGGATCAAAGGCAAGTCAAAAATGGTGGCAGCGGTGGGAATGGCT  
CCGGAATAATGTACAAGAATGGAAAAAGACGACACTACCAATAGCAAACGCTTCCGAAAT  
AGAAATTCATCGAACGCACCTAGAAACGGCGGCAATATGAAACAGCAGCAATATAGTAGACG  
GAACAGGAGATGGAATGGAATGAATAGAAGAGCCCGTCTACAAGACGGTACTACCCACGTG  
TATATGGAAGATATTACCAATATGGTCCATATATATGGTACAGATATGGGAACAAATGGAAGTTT  
GTCGGATACAACAGAATGTACGGAAGGTACAGAAGGCCCAAAAACCAAGAAGGCAACTC  
AGAATAACCAAGGAGA

**PREDICTED ORF:**

MSRLTLLALLVAVVVISRVLGQGQEKEKRNEHEPGNQDGRNQNERRERNLKIPTRKSRRIVNRN  
NNGKQMQTWQRQNYVRKYRRISPTNTINRNNGSKGKSQNGGSGGNGSGNNVQEWKKTLP  
IAKRFRNRNSSNAPRNGGNMKQQYSRRNRWNGMNRARPTRRYPRVYGRYYQYGPYIW  
YRYGNKWKVGYNRMYGRRPTKTKKATQNNQG
