# Supplementary material for: Microarray: a global analysis of biomineralization-related gene expression profiles during larval development in the pearl oyster, Pinctada fucata
Source: PubMed Central journal article supplement (PMC4445274; doi:10.1186/s12864-015-1524-2), 2015-04-19

a) 80  $\mu$ g dsRNA of Unigene18749 injected

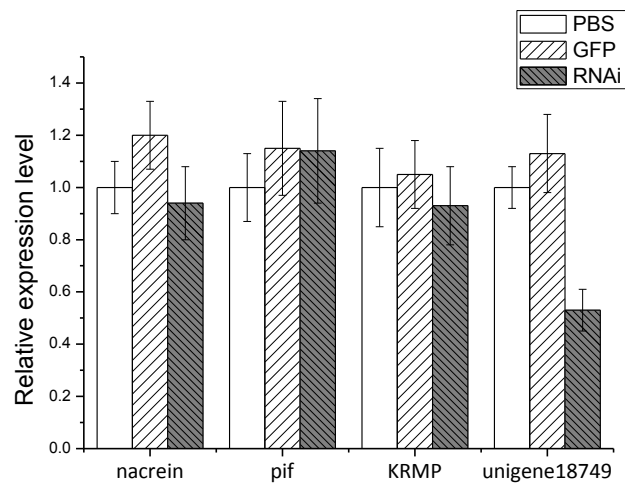

b) 80  $\mu$ g dsRNA of Unigene34354 injected

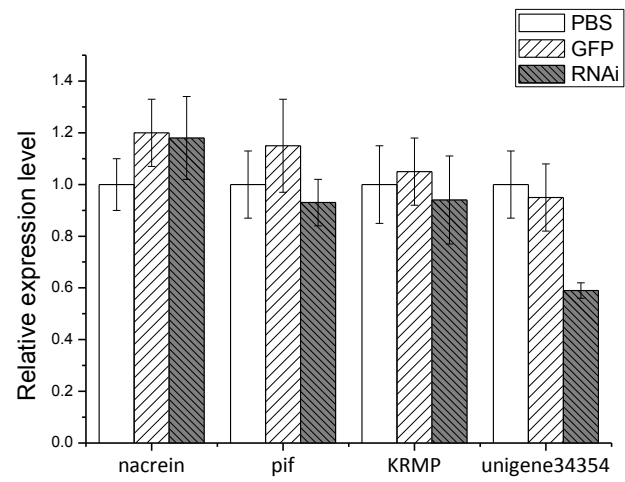

c) 80  $\mu$ g dsRNA of Unigene35118 injected

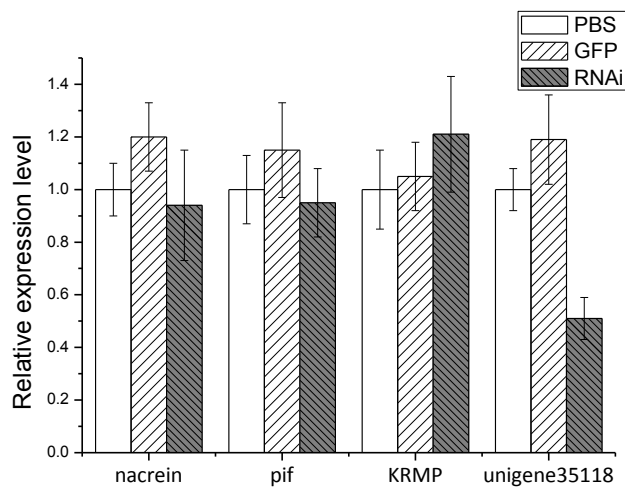

d) 80  $\mu$ g dsRNA of Unigene51738 injected

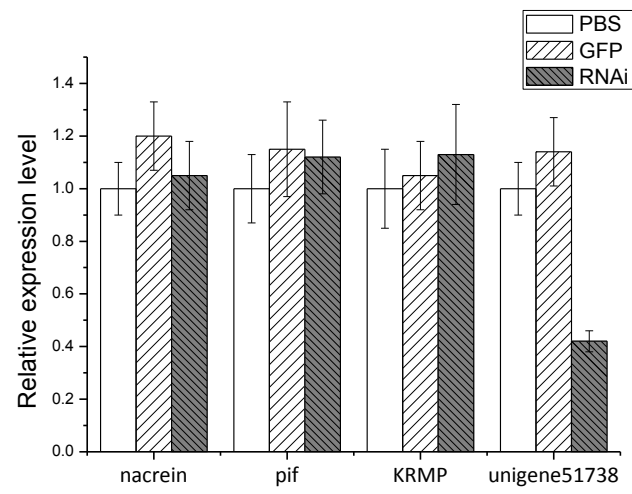

e) 80  $\mu$ g dsRNA of Unigene56675 injected

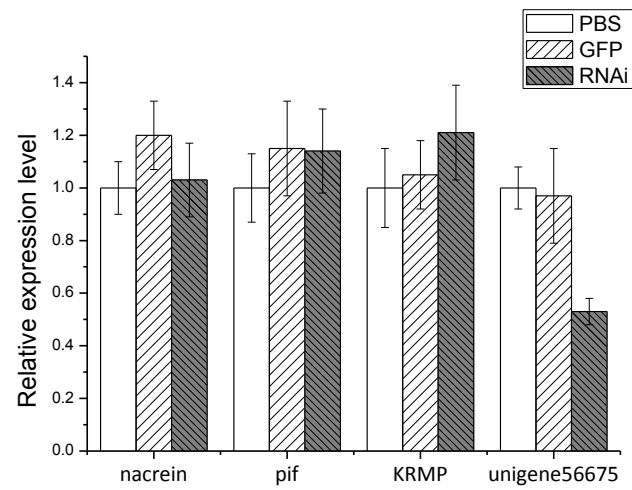

Supplement: 12864_2015_1524_MOESM6_ESM.pdf [file 12864_2015_1524_MOESM6_ESM.pdf]
