# Supplementary material for: Microarray: a global analysis of biomineralization-related gene expression profiles during larval development in the pearl oyster, Pinctada fucata
Source: PubMed Central journal article supplement (PMC4445274; doi:10.1186/s12864-015-1524-2), 2015-04-19
Supplement: 12864_2015_1524_MOESM7_ESM.pdf [file 12864_2015_1524_MOESM7_ESM.pdf]

**Additional file 1: Table S1.** Designed primers sequences used in this study.

| <b>Primer name</b>                   | <b>Primer sequences (5' to 3')</b>               |
|--------------------------------------|--------------------------------------------------|
| <b>1. semi-quantitative PCR</b>      |                                                  |
| actin-F                              | CTCCTCACTGAAGCCCCCTCA                            |
| actin-R                              | ATGGCTGGAATAGGGATTCTGG                           |
| 18749-F                              | GCGAAATGCAGAACTAGCAG                             |
| 18749-R                              | TAGCTGATGTTGGAGGAGACC                            |
| 34354-F                              | GTGTTCTCTGCACCATCTGTTA                           |
| 34354-R                              | CTGACTCATCTGTTGCCGAAT                            |
| 35118-F                              | CCTTGATGAACACCTGCTGAA                            |
| 35118-R                              | AATCGTAGTTCCACCTCTATTGC                          |
| 51738-F                              | TCACGATCATGTGAATGCAGGA                           |
| 51738-R                              | GTTCCAGTTATTCCACCAGTTGTTCC                       |
| 56675-F                              | AAGACGACACTACCAATAGCAA                           |
| 56675-R                              | TACCTCCGTACATTCTGTTGT                            |
| <b>2. RNAi experiment</b>            |                                                  |
| GFP-dsF                              | GCGTAATACGACTCACTATAGGGAGAATGGTGAGCAAGGGCGAGGAG  |
| GFP-dsR                              | GCGTAATACGACTCACTATAGGGAGATTACTTGTACAGCTCGTCCATG |
| 18749-dsF                            | GCGTAATACGACTCACTATAGGGAGAGCGAAATGCAGAACTAGCAG   |
| 18749-dsR                            | GCGTAATACGACTCACTATAGGGAGATACGTGATGTTGGAGGAGACC  |
| 34354-dsF                            | GCGTAATACGACTCACTATAGGGAGAACGAATGGTCAATGGAGACAG  |
| 34354-dsR                            | GCGTAATACGACTCACTATAGGGAGACTGACTCATCTGTTGCCGAAT  |
| 35118-dsF                            | GCGTAATACGACTCACTATAGGGAGAACAGGATGCTACGAATTGGC   |
| 35118-dsR                            | GCGTAATACGACTCACTATAGGGAGACCCGTATTCCATTTCCATTG   |
| 51738-dsF                            | GCGTAATACGACTCACTATAGGGAGAGCAGTCCTATTTGCCGTGTTA  |
| 51738-dsR                            | GCGTAATACGACTCACTATAGGGAGATGTTCTGTTCCATCTGTTCC   |
| 56675-dsF                            | GCGTAATACGACTCACTATAGGGAGAAAGAAATTCATCGAACGCACC  |
| 56675-dsR                            | GCGTAATACGACTCACTATAGGGAGATTTTGTGGGCCTTCTGTACC   |
| <b>3. Real time quantitative PCR</b> |                                                  |
| RT-18S -F                            | GGGAATCAGGGTTCGATTCC                             |
| RT-18S -R                            | CCTGCTGCCTTCCTTGGA                               |
| RT-Pif-F                             | TGCTGCCATCACGTGAGTATG                            |
| RT-Pif-R                             | GACTTCCCTTTCTCACACTTCCA                          |
| RT-ACCBP-F                           | GACATGGAACAAAGATGGTGGA                           |
| RT-ACCBP-R                           | CTGTGGCTGGAATGGTTGG                              |
| RT-P39-F                             | CTGGAATGAGAGGATATG                               |
| RT-P39-R                             | TGCTGCTGTAATAACTATA                              |
| RT-Pearlin-F                         | TGCGGACGTTACTCATACTGCT                           |
| RT-Pearlin-R                         | CCACATCTAAGCCACTCATACTCT                         |
| RT-MSI60-F                           | AGGTGGACGAAGAGGTAGAGGTAG                         |
| RT-MSI60-R                           | AGCGGCAGCGGCAACATC                               |
| RT-KRMP1-F                           | TTTCCTCCTCCTTGAGCATTCC                           |
| RT-KRMP1-R                           | CCAAAGTTGTAATCATCGCCACC                          |
| RT-Tyrosinase-F                      | AGGAGGGATGCCATTTGATA                             |

---

|                 |                          |
|-----------------|--------------------------|
| RT-Tyrosinase-R | TGGAATGAATTATGGTGTTTGG   |
| RT-Chitin syn-F | CCAAATTGCCAACCATCTG      |
| RT-Chitin syn-R | GAAAGACTCTCCCTCAGACTATGG |
| RT Smad5-F      | ATGGGCGGAGAAAGCCGTAGA    |
| RT Smad5-R      | GCCCTTACGATGGGACACTTG    |
| RT Smad3-F      | TATTGAAGCACCAGTGTTGCCTCC |
| RT Smad3-R      | TCTAAAGGTGGGCTTGGTGAAACG |
| RT Smad4-F      | CCTGGATAGGTTCTGTTTGGG    |
| RT Smad4-R      | TCTGACGGTGACACTGACGAA    |

---
